# Supplementary material
Source: MDPI journal article supplement (https://www.mdpi.com/2073-4441/15/11/2052)
Supplement: s1 [file s1]

## SUPPLEMENTARY MATERIAL

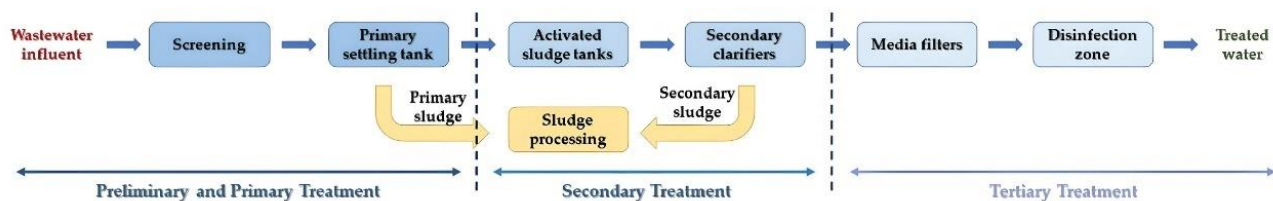

**Figure S1.** Example of a conventional treatment process in a typical municipal WWTP. Specific unit processes may vary in different MWTPs.

**Table S1.** d-spacing calculations for commercial TiO<sub>2</sub> (P25) powder.

| Bragg's Angle |          | $d_{hkl}$ (Å) | $d_{hkl}$ (nm) | hkl     |
|---------------|----------|---------------|----------------|---------|
| $2\theta$     | $\theta$ |               |                |         |
| 25.25         | 12.63    | 3.5243        | 0.35243        | 101 (A) |
| 27.37         | 13.69    | 3.2559        | 0.32559        | 110 (R) |
| 36.07         | 18.04    | 2.4881        | 0.24881        | 101 (R) |
| 36.85         | 18.43    | 2.4372        | 0.24372        | 103 (A) |
| 37.75         | 18.88    | 2.3811        | 0.23811        | 004 (A) |
| 38.49         | 19.25    | 2.3370        | 0.23370        | 112 (A) |
| 41.18         | 20.59    | 2.1904        | 0.21904        | 111 (R) |
| 47.98         | 23.99    | 1.8946        | 0.18946        | 200 (A) |
| 53.86         | 26.93    | 1.7008        | 0.17008        | 105 (A) |
| 54.25         | 27.13    | 1.6895        | 0.16895        | 211 (R) |
| 54.99         | 27.50    | 1.6685        | 0.16685        | 211 (A) |
| 62.68         | 31.34    | 1.4810        | 0.14810        | 204 (A) |
| 68.82         | 34.41    | 1.3631        | 0.13631        | 116 (A) |
| 70.31         | 35.16    | 1.3378        | 0.13378        | 220 (A) |
| 74.97         | 37.49    | 1.2658        | 0.12658        | 215 (A) |
| 82.83         | 41.42    | 1.1645        | 0.11645        | 224 (A) |

**Table S2.** d-spacing calculations for N-doped TiO<sub>2</sub> powder.

| Bragg's Angle |          | $d_{hkl}$ (Å) | $d_{hkl}$ (nm) | hkl     |
|---------------|----------|---------------|----------------|---------|
| $2\theta$     | $\theta$ |               |                |         |
| 25.26         | 12.63    | 3.5229        | 0.35229        | 101 (A) |
| 27.37         | 13.69    | 3.2559        | 0.32559        | 110 (R) |
| 37.79         | 18.90    | 2.3787        | 0.23787        | 004 (A) |
| 48.07         | 24.04    | 1.8913        | 0.18913        | 200 (A) |
| 53.95         | 26.98    | 1.6982        | 0.16982        | 105 (A) |
| 54.98         | 27.49    | 1.6688        | 0.16688        | 211 (A) |
| 62.60         | 31.30    | 1.4827        | 0.14827        | 204 (A) |
| 68.86         | 34.43    | 1.3624        | 0.13624        | 116 (A) |
| 70.37         | 35.19    | 1.3368        | 0.13368        | 220 (A) |
| 75.22         | 37.61    | 1.2622        | 0.12622        | 215 (A) |
| 82.71         | 41.36    | 1.1658        | 0.11658        | 224 (A) |

**Table S3.** d-spacing calculations for N,S-codoped TiO<sub>2</sub> powder.

| Bragg's Angle |       | dhkl (Å) | dhkl (nm) | hkl     |
|---------------|-------|----------|-----------|---------|
| 2θ            | θ     |          |           |         |
| 25.27         | 12.64 | 3.5215   | 0.35215   | 101 (A) |
| 37.71         | 18.86 | 2.3835   | 0.23835   | 004 (A) |
| 48.03         | 24.02 | 1.8927   | 0.18927   | 200 (A) |
| 54.61         | 27.31 | 1.6792   | 0.16792   | 105 (A) |
| 62.73         | 31.37 | 1.4800   | 0.14800   | 204 (A) |
| 69.21         | 34.61 | 1.3564   | 0.13564   | 116 (A) |
| 75.20         | 37.60 | 1.2625   | 0.12625   | 215 (A) |
| 82.77         | 41.39 | 1.1652   | 0.11652   | 224 (A) |

**Table S4.** d-spacing calculations for Ag@N-doped TiO<sub>2</sub> powder.

| Bragg's Angle |       | dhkl (Å) | dhkl (nm) | hkl      |
|---------------|-------|----------|-----------|----------|
| 2θ            | θ     |          |           |          |
| 25.29         | 12.65 | 3.5188   | 0.35188   | 101 (A)  |
| 37.83         | 18.92 | 2.3763   | 0.23763   | 004 (A)  |
| 44.24         | 22.12 | 2.0457   | 0.20457   | 200 (Ag) |
| 48.06         | 24.03 | 1.8916   | 0.18916   | 200 (A)  |
| 54.02         | 27.01 | 1.6962   | 0.16962   | 105 (A)  |
| 54.97         | 27.49 | 1.6691   | 0.16691   | 211 (A)  |
| 56.56         | 28.29 | 1.6256   | 0.16256   | 241 (Ag) |
| 62.64         | 31.32 | 1.4819   | 0.14819   | 204 (A)  |
| 68.94         | 34.47 | 1.3610   | 0.13610   | 116 (A)  |
| 70.31         | 35.16 | 1.3378   | 0.13378   | 220 (A)  |
| 75.18         | 37.59 | 1.2628   | 0.12628   | 215 (A)  |
| 82.82         | 41.41 | 1.1646   | 0.11646   | 224 (A)  |

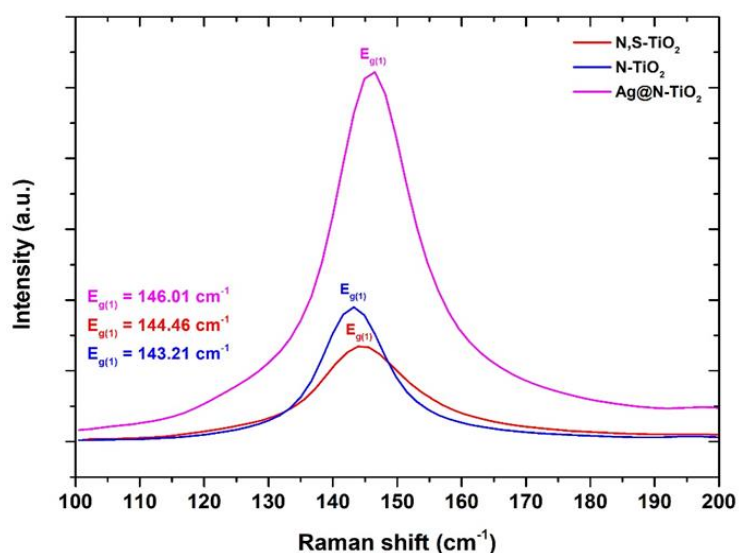

**Figure S2.** Magnification of  $E_{g(1)}$  Raman active mode of anatase TiO<sub>2</sub> phase of the examined chemically modified powders.

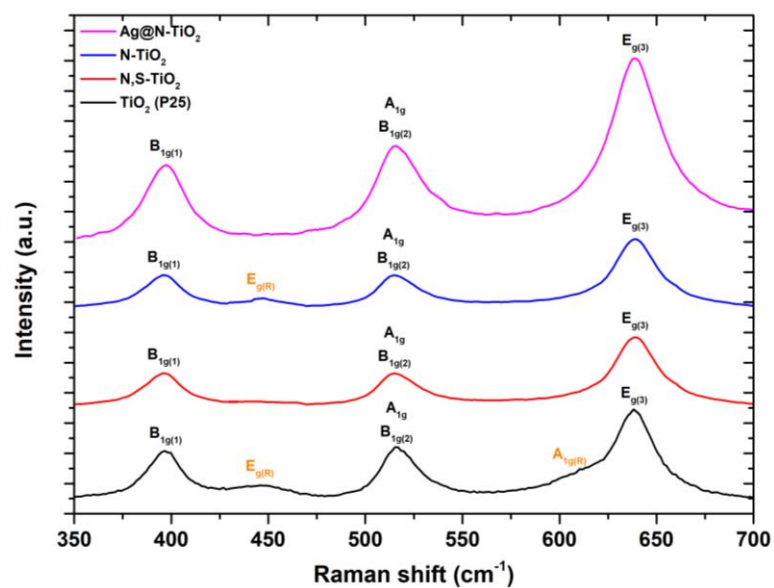

**Figure S3.** Magnification of 350-700  $\text{cm}^{-1}$  Raman spectral region of the studied powders. Anatase  $\text{TiO}_2$  modes are marked with black, while rutile  $\text{TiO}_2$  modes are marked with orange.

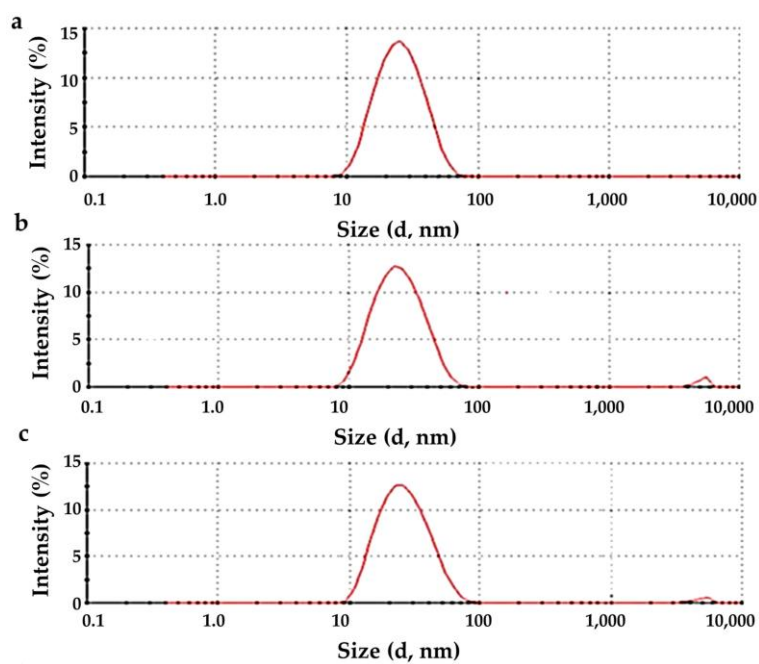

**Figure S4.** Size distribution diagram of the aqueous dispersion solutions of: (a)  $\text{Ag@N-TiO}_2$ , (b)  $\text{N-TiO}_2$  and (c)  $\text{N,S-TiO}_2$  particles.

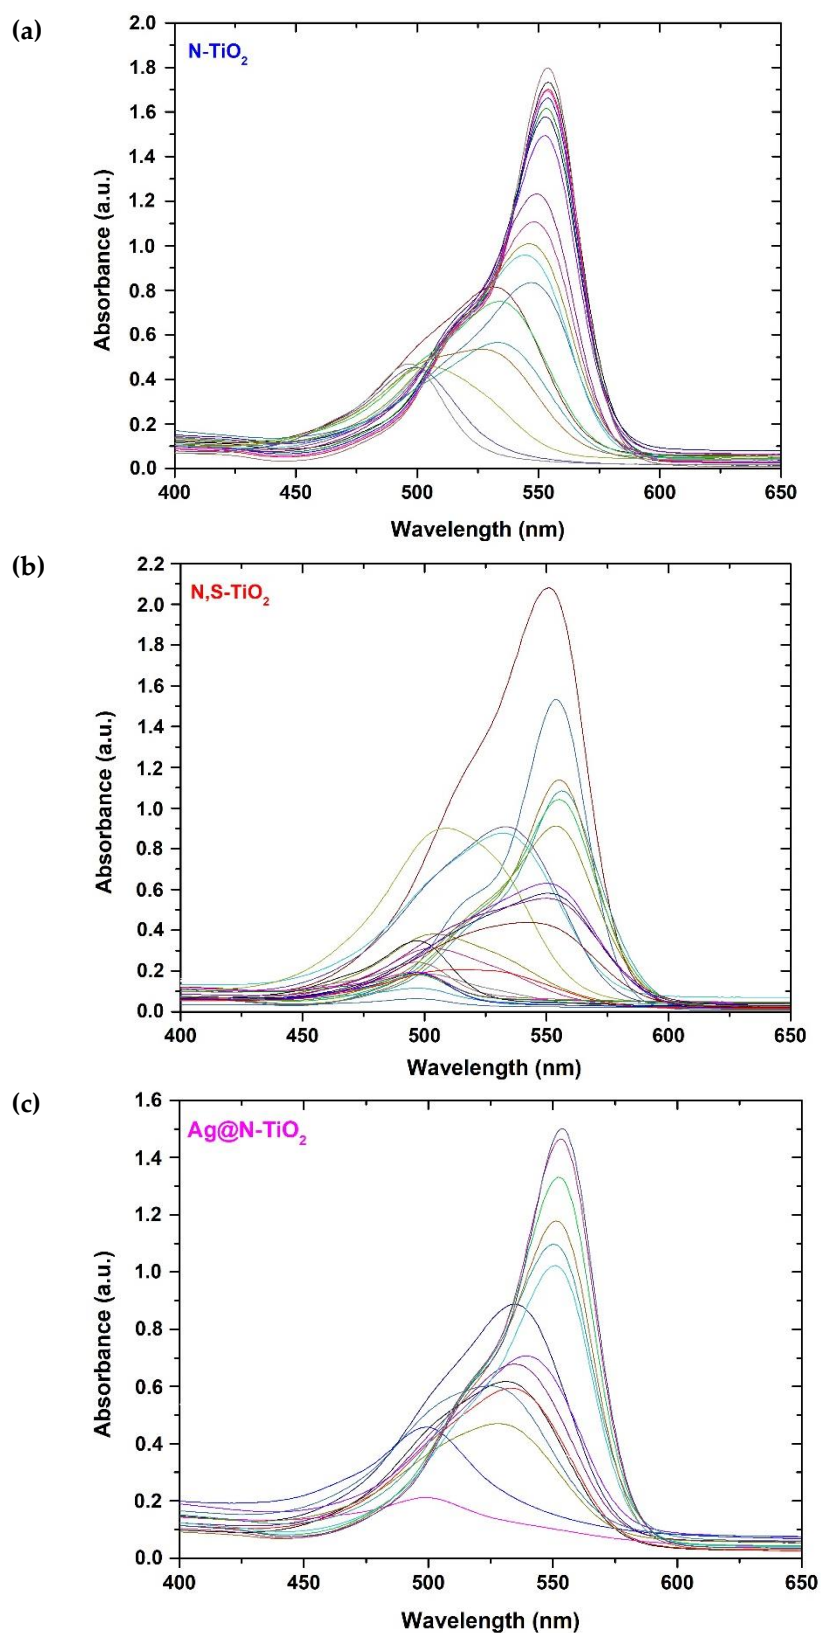

**Figure S5.** Real time UV-visible spectra obtained every 15 min under visible light photocatalytic degradation of Rhodamine B in presence of: (a) N-doped TiO<sub>2</sub>, (b) N,S-codoped TiO<sub>2</sub> and (c) Ag loaded N-doped TiO<sub>2</sub> powder.

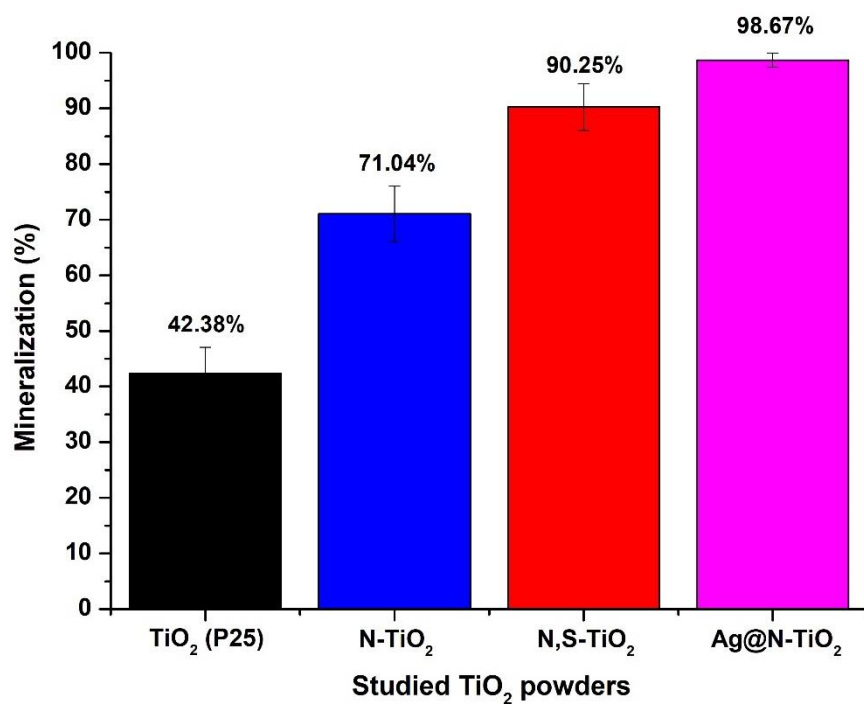

**Figure S6.** Mineralization (%) of each studied chemically modified  $\text{TiO}_2$  sample, obtained through TOC analysis, after the photocatalytic procedure under visible light irradiation.

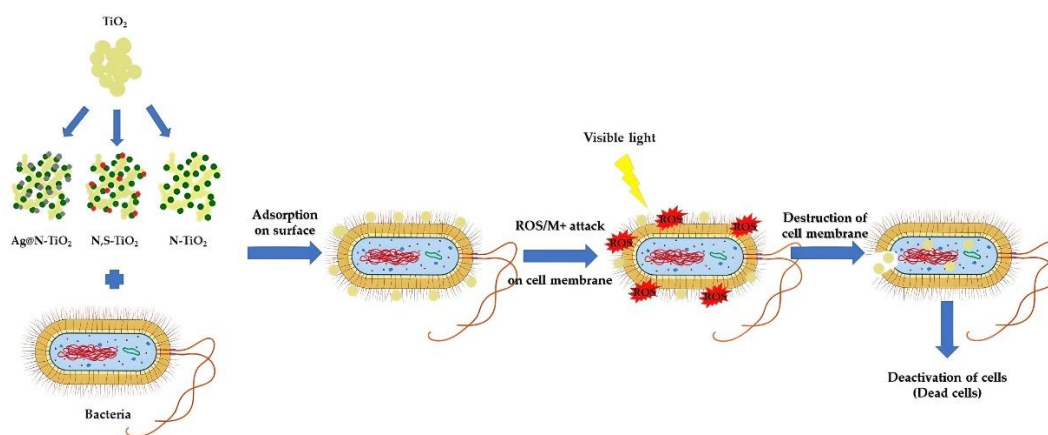

**Figure S7.** Schematic representation of the photocatalytic disinfection of MWTP effluents containing bacteria using the studied chemically modified  $\text{TiO}_2$  powders.

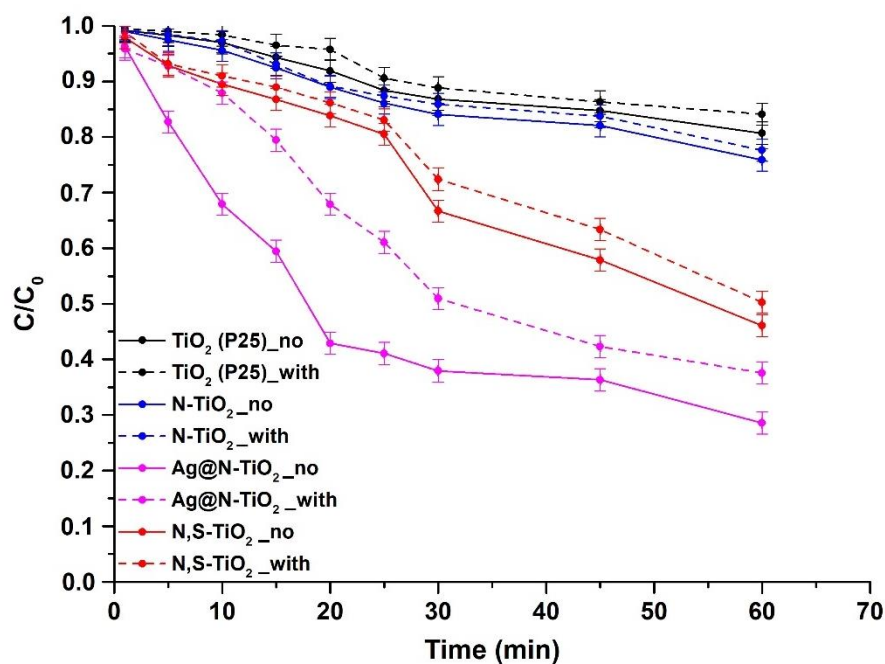

**Figure S8.** Study of the photocatalytic efficiency of  $\text{TiO}_2$  (P25), N-doped  $\text{TiO}_2$ , N,S-codoped  $\text{TiO}_2$  and Ag loaded N-doped  $\text{TiO}_2$  powders towards the degradation of RhB dye under visible light irradiation in the presence (dashed line) and in the absence (solid line) of n-butanol  $\bullet\text{OH}$  scavenger.

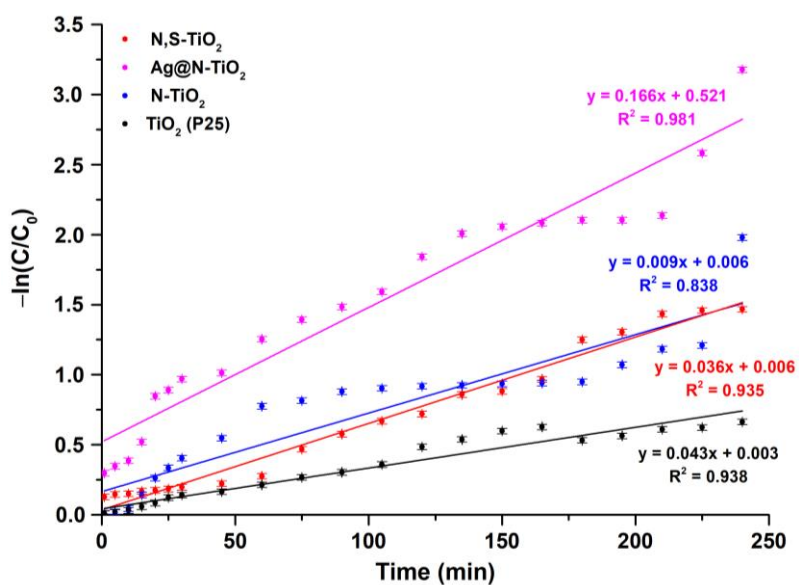

**Figure S9.** Photocatalytic kinetic model studies for the examined  $\text{TiO}_2$  powders following a pseudo-first order model upon visible light irradiation photocatalysis.

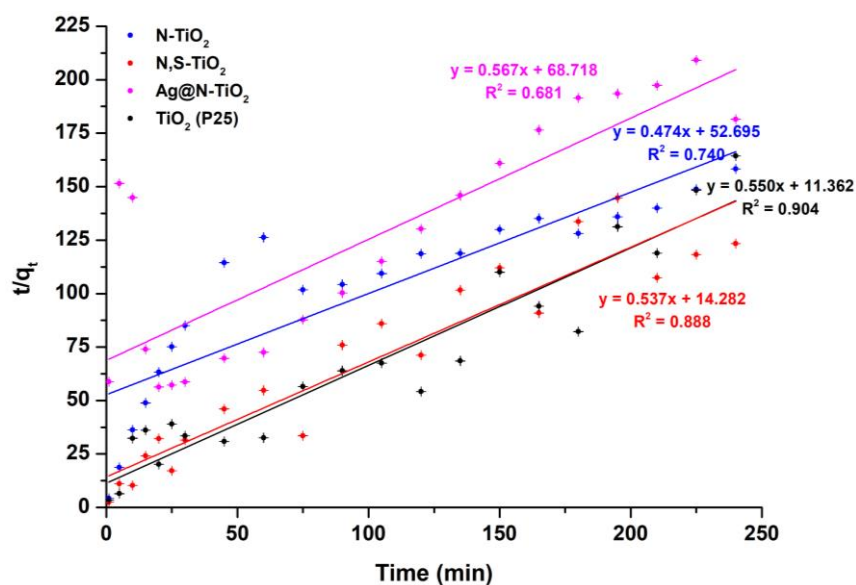

**Figure S10.** Photocatalytic kinetic model studies for the examined  $\text{TiO}_2$  powders following a pseudo-second order model upon visible light irradiation photocatalysis.

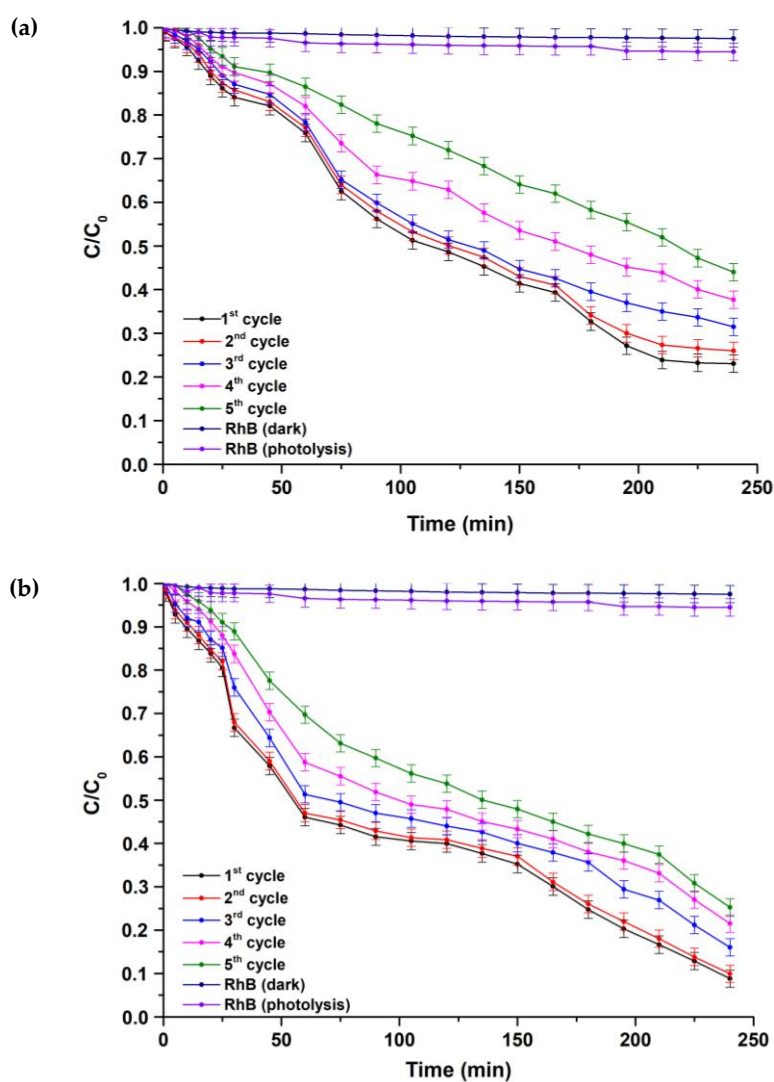



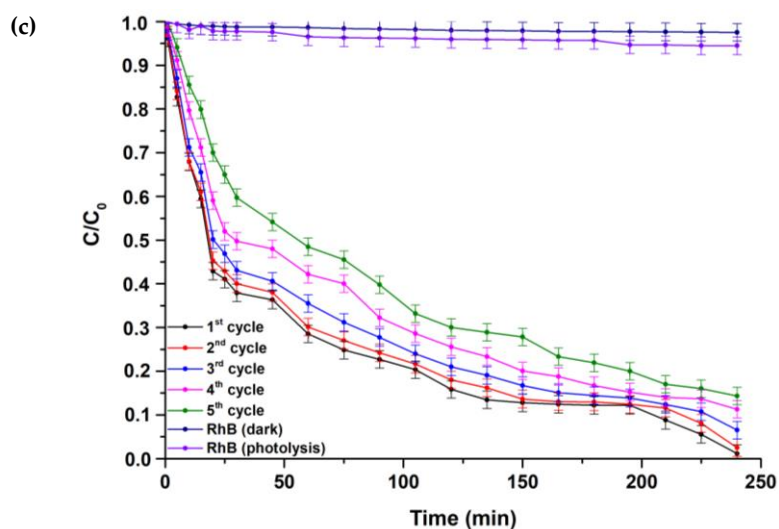

**Figure S11.** Study of the photocatalytic stability of (a) N-doped TiO<sub>2</sub>, (b) N,S-codoped TiO<sub>2</sub> and (c) Ag loaded N-doped TiO<sub>2</sub> powders towards the degradation of RhB dye after 5 cycles under visible light irradiation.

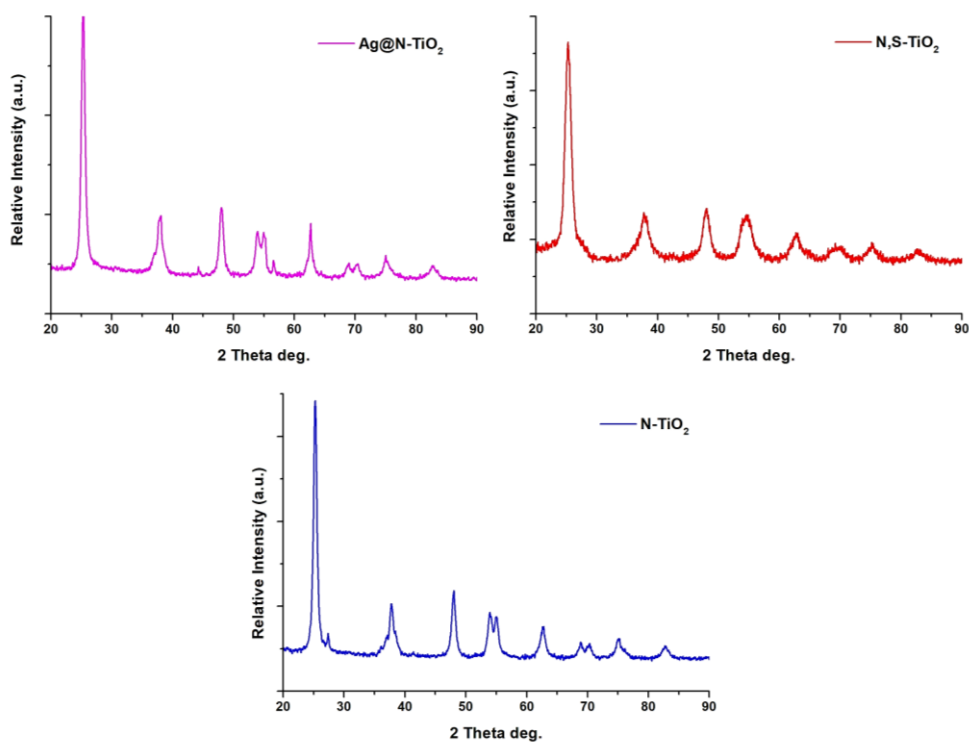

**Figure S12.** XRD patterns of the studied TiO<sub>2</sub> powders after five photocatalytic cycles of RhB degradation under visible light irradiation.



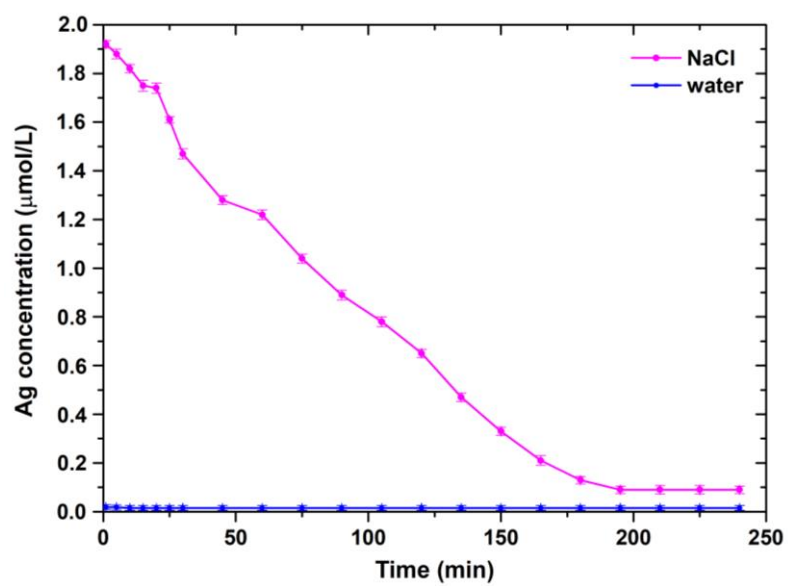

Figure S13. Silver dissolution study for the Ag loaded N-doped TiO<sub>2</sub> powder.
